# Supplementary material for: The structure of wheat bread influences the postprandial metabolic response in healthy men
Source: Royal Society of Chemistry journal article supplement (doi:10.1039/c5fo00354g), 2015-01-01
Supplement: c5fo00354g2.pdf [file c5fo00354g2.pdf]

Supplementary files

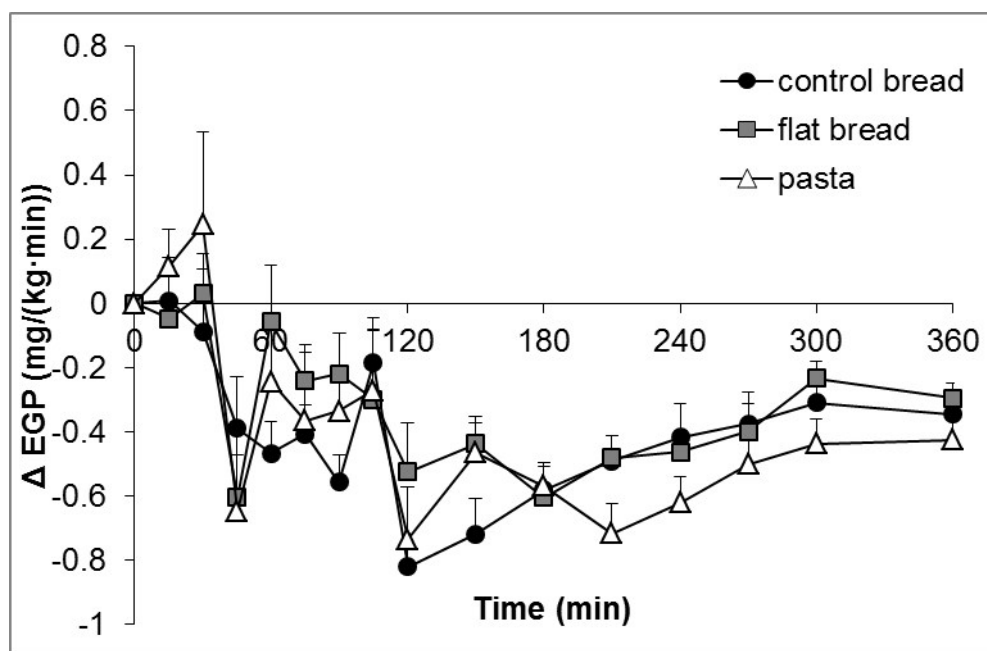

**Supplemental Figure 1** Mean ( $\pm$  SEM) changes from baseline of EGP, after ingestion of 138 g  $^{13}\text{C}$ -enriched control bread (●), 119 g  $^{13}\text{C}$ -enriched flat bread (■), and 127 g  $^{13}\text{C}$ -enriched pasta (△) in healthy men (n=10). EGP, endogenous glucose production.

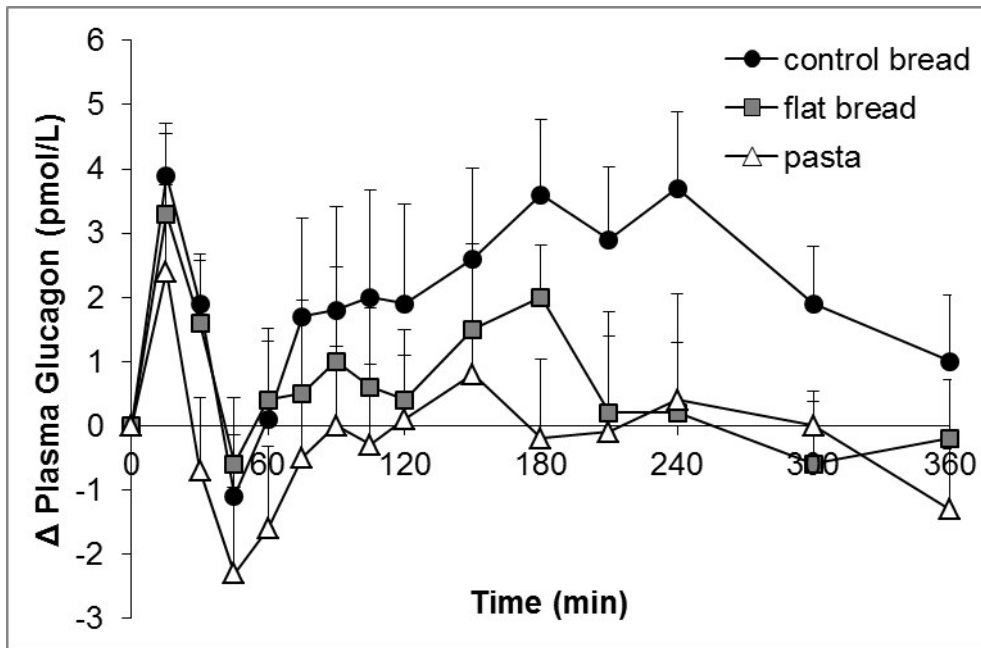

**Supplemental Figure 2** Mean ( $\pm$  SEM) changes from baseline in plasma glucagon concentrations, after ingestion of 138 g  $^{13}\text{C}$ -enriched control bread (●), 119 g  $^{13}\text{C}$ -enriched flat bread (■), and 127 g  $^{13}\text{C}$ -enriched pasta ( $\Delta$ ) in healthy men (n=10).

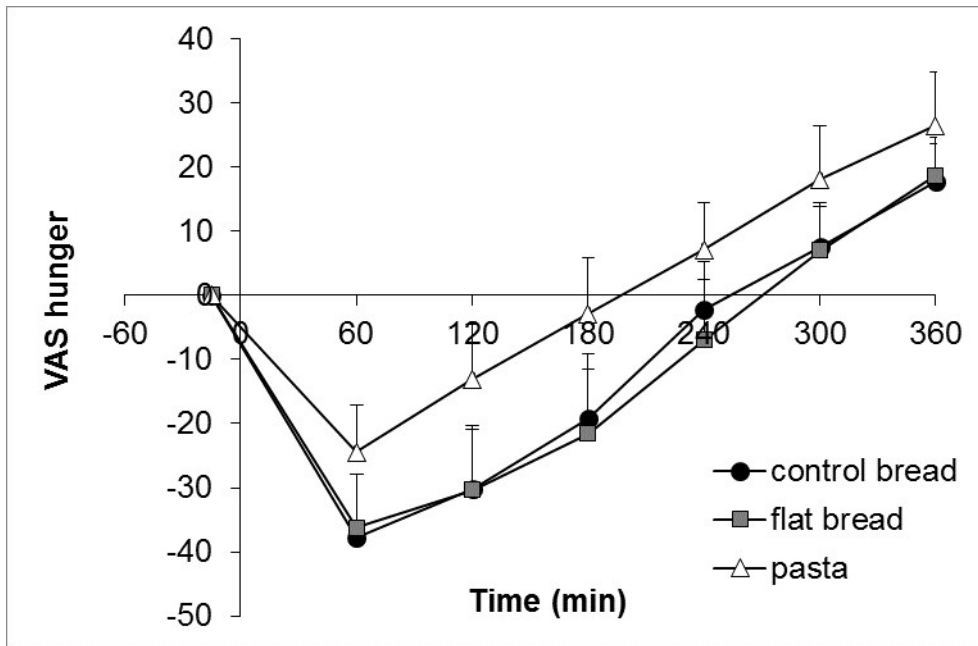

**Supplemental Figure 3** Mean ( $\pm$  SEM) changes from baseline in subjective rating of hunger using VAS after ingestion of 138 g  $^{13}\text{C}$ -enriched control bread (●), 119 g  $^{13}\text{C}$ -enriched flat bread (■), and 127 g  $^{13}\text{C}$ -enriched pasta ( $\Delta$ ) in healthy men ( $n=10$ ). VAS, visual analogue scale.

**Supplemental Table 1** Image analysis parameters from 3D XRT data<sup>1</sup>

|                      | <b>Average cell wall<br/>thickness (µm)</b> | <b>Average cell<br/>diameter (µm)</b> | <b>Porosity (%)</b> |
|----------------------|---------------------------------------------|---------------------------------------|---------------------|
| <b>Control bread</b> | 143 ± 7 <sup>a</sup>                        | 900 ± 143 <sup>a</sup>                | 83 ± 3 <sup>a</sup> |
| <b>Flat bread</b>    | 278 ± 22 <sup>b</sup>                       | 476 ± 68 <sup>b</sup>                 | 47 ± 3 <sup>b</sup> |
| <b>Pasta</b>         | 188 ± 36 <sup>c</sup>                       | 25 ± 1 <sup>c</sup>                   | 3 ± 1 <sup>c</sup>  |

<sup>1</sup>Data are presented as means ± SD, n=3. Values followed by different letters in a column are significantly different (P < 0.05; LSD test). XRT, X-ray microtomography

**Supplemental Table 2** Post hoc analyses of insulin sensitivity after ingestion of 138 g <sup>13</sup>C-enriched control bread, 119 g <sup>13</sup>C-enriched flat bread and 127 g <sup>13</sup>C-enriched pasta (uncooked weight) using GCR and insulin data<sup>1</sup>

|           | <b>0-2h</b>       | <b>0-3h</b>             | <b>0-6h</b>       |
|-----------|-------------------|-------------------------|-------------------|
| <b>CB</b> | 11.0 <sup>a</sup> | 18.4 <sup>a,b</sup>     | 26.3 <sup>a</sup> |
| <b>FB</b> | 11.4 <sup>a</sup> | <b>19.9<sup>a</sup></b> | 29.4 <sup>a</sup> |
| <b>PA</b> | 9.5 <sup>a</sup>  | <b>15.6<sup>b</sup></b> | 26.7 <sup>a</sup> |

<sup>1</sup>A higher relative value indicates increased insulin sensitivity. Values followed by different letters in a column are significantly different (P < 0.05; t-test). CB, control bread; FB, flat bread; PA, pasta.
